# Supplementary material for: Recurrence/Regrowth in Grade I Meningioma: How to Predict?
Source: PubMed Central journal article supplement (PMC7438949; doi:10.3389/fonc.2020.01144), 2020-08-04
Supplement: Data_Sheet_1.pdf [file Data_Sheet_1.pdf]

### *Supplementary Material*

**Table S1:1** Relation between Ki67 and epidemiological variables, immunomarkers, imaging, histopathology and clinical evolution.

| Variable             |        | n  | Ki67 |                    |             |      |      |      |       | p value      |
|----------------------|--------|----|------|--------------------|-------------|------|------|------|-------|--------------|
|                      |        |    | Mean | Standard deviation | Median      | P 25 | P 75 | Min. | Max.  |              |
| <b>Sex</b>           | Female | 69 | 2.51 | 2.34               | <b>2.00</b> | 1.40 | 3.40 | 0.00 | 16.00 | 0.363        |
|                      | Male   | 27 | 2.86 | 2.14               | <b>2.20</b> | 1.60 | 4.00 | 0.20 | 10.40 |              |
| <b>PR</b>            | -      | 35 | 2.70 | 2.84               | <b>2.00</b> | 0.80 | 3.60 | 0.00 | 16.00 | 0.790        |
|                      | +      | 57 | 2.56 | 1.96               | <b>2.20</b> | 1.40 | 3.20 | 0.40 | 10.40 |              |
| <b>ER</b>            | -      | 92 | 2.58 | 2.31               | <b>2.10</b> | 1.40 | 3.40 | 0.00 | 16.00 | 0.626        |
|                      | +      | 2  | 3.20 | 2.55               | <b>3.20</b> | 1.40 | 5.00 | 1.40 | 5.00  |              |
| <b>AR</b>            | -      | 87 | 2.52 | 2.33               | <b>1.80</b> | 1.40 | 3.40 | 0.00 | 16.00 | 0.097        |
|                      | +      | 6  | 3.60 | 2.33               | <b>2.90</b> | 2.60 | 4.80 | 1.40 | 7.00  |              |
| <b>p53</b>           | -      | 7  | 2.66 | 1.29               | <b>2.20</b> | 1.60 | 4.00 | 0.80 | 4.20  | 0.481        |
|                      | +      | 88 | 2.61 | 2.37               | <b>2.00</b> | 1.40 | 3.40 | 0.00 | 16.00 |              |
| <b>COX-2</b>         | -      | 0  |      |                    |             |      |      |      |       |              |
|                      | +      | 93 | 2.59 | 2.32               | <b>2.00</b> | 1.40 | 3.40 | 0.00 | 16.00 |              |
| <b>Calcification</b> | No     | 86 | 2.58 | 2.38               | <b>2.00</b> | 1.40 | 3.40 | 0.00 | 16.00 | 0.272        |
|                      | Yes    | 10 | 2.79 | 1.38               | <b>2.90</b> | 1.80 | 3.60 | 0.40 | 4.80  |              |
| <b>Edema</b>         | No     | 68 | 2.56 | 2.56               | <b>1.80</b> | 1.30 | 3.30 | 0.00 | 16.00 | 0.120        |
|                      | Yes    | 28 | 2.73 | 1.45               | <b>2.50</b> | 1.60 | 3.60 | 0.40 | 7.00  |              |
| <b>Recurrence</b>    | No     | 82 | 2.45 | 2.27               | <b>1.80</b> | 1.20 | 3.40 | 0.00 | 16.00 | <b>0.014</b> |
|                      | Yes    | 14 | 3.52 | 2.25               | <b>3.10</b> | 2.00 | 3.80 | 1.50 | 10.40 |              |
| <b>Size</b>          | Medium | 27 | 2.66 | 2.02               | <b>2.20</b> | 1.40 | 3.60 | 0.40 | 10.40 | 0.577        |
|                      | Large  | 55 | 2.63 | 2.61               | <b>2.00</b> | 1.20 | 3.40 | 0.00 | 16.00 |              |

Legend: Ki67, cell proliferation index by MIB-1/Ki67 monoclonal antibody; P, percentile; PR, progesterone receptor; ER, estrogen receptor; AR, androgen receptor; p53, nuclear phosphoprotein p53; COX-2, cyclooxygenase-2; HLA-G, human leukocyte antigen G; HLA-E, human leukocyte antigen E. Note: Mann Whitney test, \* Kruskal-Wallis.

| Cont. Table S1: Relation between Ki67 and epidemiological variables, immunomarkers, imaging, histopathology and clinical evolution.. |                       |    |      |                    |             |      |      |      |         |
|--------------------------------------------------------------------------------------------------------------------------------------|-----------------------|----|------|--------------------|-------------|------|------|------|---------|
| Variable                                                                                                                             |                       | n  | Mean | Standard deviation | Ki67        |      |      |      | p value |
|                                                                                                                                      |                       |    |      |                    | Median      | P 25 | P 75 | Min. |         |
| HLA-G                                                                                                                                | -                     | 0  |      |                    |             |      |      |      |         |
|                                                                                                                                      | +                     | 90 | 2.65 | 2.34               | <b>2.20</b> | 1.40 | 3.40 | 0.00 | 16.00   |
| HLA-E                                                                                                                                | -                     | 3  | 1.00 | 1.56               | <b>0.20</b> | 0.00 | 2.80 | 0.00 | 2.80    |
|                                                                                                                                      | +                     | 87 | 2.69 | 2.35               | <b>2.20</b> | 1.40 | 3.60 | 0.40 | 16.00   |
| <b>Subtypes of grade I meningiomas</b>                                                                                               | Fibrous               | 7  | 1.86 | 0.96               | <b>2.20</b> | 0.80 | 2.40 | 0.20 | 2.80    |
|                                                                                                                                      | Meningothelial        | 67 | 2.62 | 2.53               | <b>1.80</b> | 1.40 | 3.40 | 0.40 | 16.00   |
|                                                                                                                                      | Transitional          | 14 | 3.36 | 1.78               | <b>3.80</b> | 1.60 | 4.80 | 0.40 | 5.60    |
| <b>Follow-up</b>                                                                                                                     | Alive/death unrelated | 75 | 2.57 | 2.10               | <b>2.20</b> | 1.40 | 3.40 | 0.40 | 16.00   |
|                                                                                                                                      | Dead                  | 21 | 2.73 | 2.93               | <b>1.80</b> | 0.80 | 3.40 | 0.00 | 10.40   |

Legend: Ki67, cell proliferation index by MIB-1/Ki67 monoclonal antibody; P, percentile; PR, progesterone receptor; ER, estrogen receptor; AR, androgen receptor; p53, nuclear phosphoprotein p53; COX-2, cyclooxygenase-2; HLA-G, human leukocyte antigen G; HLA-E, human leukocyte antigen E. Note: Mann Whitney test, \* Kruskal-Wallis.

**Table S2:** Percentage of Ki67 expression in series of meningiomas.

| Authors, year, country                    | No. of cases of grade I meningiomas | Ki67: Mean $\pm$ SD (Amplitude)/% [median] | Mean Ki67 in primary tumors [median] | Mean Ki67 in recurrent tumors [median] | p: primary vs recurrent tumor correlation |
|-------------------------------------------|-------------------------------------|--------------------------------------------|--------------------------------------|----------------------------------------|-------------------------------------------|
| Carvalho et al., 2019, Brazil             | 96                                  | 2.61 $\pm$ 2.29(0-16) [median=2.10]        | 2.45 [1.80]                          | 3.52 [3.10]                            | Median. p=0.014                           |
| Amatya et al., 2001, Japan                | 109                                 | 1.5 $\pm$ 1.3 (0 – 72)                     |                                      |                                        |                                           |
| Konstantinidou et al., 2003, Greece       | 51                                  | 1.0 (0.1 – 9.2)                            |                                      |                                        |                                           |
| Wolfsberger et al., 2004, Austria/Germany | 55                                  | 3.5                                        |                                      |                                        |                                           |
| Whittle et al., 2004, Scotland (120)      | Review                              | 1.0 – 1.35                                 | 0.39 – 3.8                           | 2.3 – 10.9                             | p < 0.005                                 |
| Roser et al., 2004, Germany               | 526                                 | 3.54 $\pm$ 4.97 (0 – 58)                   |                                      |                                        |                                           |
| Korhonen et al., 2006, Finland            | 441 primary tumors                  | 3.1 $\pm$ 2.8                              |                                      |                                        |                                           |
| Omulecka et al., 2006, Poland             | 46                                  | 3.7                                        |                                      |                                        |                                           |
| Maiuri et al., 2007, Italy                | 100                                 |                                            | <                                    | >                                      | P = 0.0001                                |

| <b>Cont. Table S2: Percentage of Ki67 expression in series of meningiomas.</b> |                                            |                                                              |                                                |                                                  |                                                  |
|--------------------------------------------------------------------------------|--------------------------------------------|--------------------------------------------------------------|------------------------------------------------|--------------------------------------------------|--------------------------------------------------|
| <b>Authors, year, country</b>                                                  | <b>No. of cases of grade I meningiomas</b> | <b>Ki67: Mean <math>\pm</math> SD (Amplitude)/% [median]</b> | <b>Mean of Ki67 in primary tumors [median]</b> | <b>Mean of Ki67 in recurrent tumors [median]</b> | <b>p: primary vs recurrent tumor correlation</b> |
| Takei et al., 2008, USA                                                        | 46                                         | 2.9 $\pm$ 2.0 (0.35 – 8.4)                                   |                                                |                                                  |                                                  |
| Abry et al., 2010, Norway                                                      | Metanalysis                                | 3.0 (1 – 16)                                                 | 2.0 (0 – 20)                                   | 4.0                                              | p < 0.05                                         |
| Kandemir et al., 2010, Turkey                                                  | 53                                         | 2.8 $\pm$ 2.0                                                |                                                |                                                  |                                                  |
| Kärja et al., 2010, Finland/Sweden                                             | 59                                         | (0 – 10)                                                     | 3.3 $\pm$ 0.4                                  | 3.9 $\pm$ 0.5                                    | p = 0.342                                        |
| Shayanfar et al., 2010, Iran                                                   | 63                                         | 2.98 $\pm$ 2.27                                              |                                                |                                                  |                                                  |
| Abdelzaher et al., 2011, Egypt                                                 | 60                                         | 2.37 $\pm$ 1.86                                              |                                                |                                                  | P = 0.002                                        |
| Babu et al., 2011, India                                                       | 211                                        | 4.07 $\pm$ 3.83                                              | <                                              | >                                                | p = 0.0093                                       |
| Al-Nuamy et al., 2012, Iraq                                                    | 42                                         | 1.8 $\pm$ 3.5                                                |                                                |                                                  |                                                  |
| Lee et al., 2013, South Korea                                                  | 49                                         | 2.4 (0 – 18)                                                 |                                                |                                                  |                                                  |
| Pavelin, 2013, Croatia                                                         | 142                                        | 1.5 (0 – 13.9)                                               |                                                |                                                  |                                                  |
| Iplikcioglu et al., 2014, Turkey                                               | 48                                         | 3.34 $\pm$ 3.27                                              |                                                |                                                  |                                                  |
| Mukhopadhyay et al., 2017, India                                               | 82                                         | 2.57 $\pm$ 1.67                                              |                                                |                                                  |                                                  |
